# Supplementary material
Source: publisher figshare collection journal article supplement (https://acs.figshare.com/ndownloader/files/3842524)
Supplement: Supplementary file 1 [file 3842524]

## Sheet: Figure S1 - ATPase panel
Gene Name (Name)	Reference	Annotation	Sequence	ATPase class
AFG3L2	UniRef100_Q9Y4W6	AFG3-like protein 2 [Homo sapiens (Human)]	GAILTGPPGTGkTLLAK	AAA+
ATAD1	UniRef100_Q8NBU5	ATPase family AAA domain-containing protein 1 [Homo sapiens (Human)]	GVLLYGPPGCGkTLIAK	AAA+
ATAD1	UniRef100_Q8NBU5	ATPase family AAA domain-containing protein 1 [Homo sapiens (Human)]	HVDLLEVAQETDGFSGSDLkEMCR	AAA+
ATAD2,ATAD2B	UniRef100_Q6PL18	ATPase family AAA domain-containing protein 2 [Homo sapiens (Human)]	GCLFYGPPGTGkTLVAR	AAA+
CLPB	UniRef100_Q9H078	Caseinolytic peptidase B protein homolog [Homo sapiens (Human)]	RKENGWYDEEHPLVFLFLGSSGIGkTELAK	AAA+
CLPX	UniRef100_O76031	ATP-dependent Clp protease ATP-binding subunit ClpX-like, mitochondrial precursor [Homo sapiens (Human)]	SNILLLGPTGSGkTLLAQTLAK	AAA+
DYNC1H1 [ATP1]	UniRef100_Q14204	Dynein heavy chain, cytosolic [Homo sapiens (Human)]	LGGSPFGPAGTGkTESVK	AAA+
DYNC1H1 [ATP4]	UniRef100_Q14204	Dynein heavy chain, cytosolic [Homo sapiens (Human)]	QPQGHLLLIGVSGAGkTTLSR	AAA+
KATNA1	UniRef100_O75449	Katanin p60 ATPase-containing subunit A1 [Homo sapiens (Human)]	TLLAkAVATECK	AAA+
LONP1	UniRef100_P36776	Lon protease homolog, mitochondrial precursor [Homo sapiens (Human)]	ILCFYGPPGVGkTSIAR	AAA+
MCM2	UniRef100_P49736	DNA replication licensing factor MCM2 [H	SQFLkYIEK	AAA+
MCM3	UniRef100_P25205	DNA replication licensing factor MCM3 [Homo sapiens (Human)]	GDINILLIGDPSVAkSQLLR	AAA+
MCM4	UniRef100_P33991	DNA replication licensing factor MCM4 [Homo sapiens (Human)]	SLFSDkQMIK	AAA+
MCM6	UniRef100_Q14566	DNA replication licensing factor MCM6 [H	GDINVCIVGDPSTAkSQFLK	AAA+
MCM6	UniRef100_Q14566	DNA replication licensing factor MCM6 [H	SQFLkHVEEFSPR	AAA+
MDN1	UniRef100_Q9NU22	Midasin [Homo sapiens (Human)]	SSSVFAGkQGFITLR	AAA+
MDN1 [ATP3]	UniRef100_Q9NU22	Midasin [Homo sapiens (Human)]	VVSAGTYPVLIQGETSVGkTSLIQWLAAATGNHCVR	AAA+
MDN1 [ATP4]	UniRef100_Q9NU22	Midasin [Homo sapiens (Human)]	ALEFGEPVLLVGDTGCGkTTICQVFAALANQK	AAA+
NSF	UniRef100_P46459	Vesicle-fusing ATPase [Homo sapiens (Human)]	VWIGIkK	AAA+
NSF [ATP1]	UniRef100_P46459	Vesicle-fusing ATPase [Homo sapiens (Human)]	GILLYGPPGCGkTLLAR	AAA+
NVL [ATP1]	UniRef100_O15381	Nuclear valosin-containing protein-like [Homo sapiens (Human)]	GVLLHGPPGCGkTLLAHAIAGELDLPILK	AAA+
NVL [ATP2]	UniRef100_O15381	Nuclear valosin-containing protein-like [Homo sapiens (Human)]	ALGLVTPAGVLLAGPPGCGkTLLAK	AAA+
PEX1 [ATP1]	UniRef100_O43933	Peroxisome biogenesis factor 1 [Homo sap	NGALLLTGGkGSGK	AAA+
PSMC1	UniRef100_P62191	26S protease regulatory subunit 4 [Homo sapiens...	GVILYGPPGTGkTLLAK	AAA+
PSMC2	UniRef100_Q75L23	Hypothetical protein PSMC2 [Homo sapiens (Human)]	GVLLFGPPGTGkTLCAR	AAA+
PSMC3	UniRef100_P17980	26S protease regulatory subunit 6A [Homo sapien…	GVLMYGPPGTGkTLLAR	AAA+
PSMC4	UniRef100_P43686	26S protease regulatory subunit 6B [Homo sapien...	GVLMYGPPGCGkTMLAK	AAA+
PSMC5	UniRef100_P62195	26S protease regulatory subunit 8 [Homo sapiens...	GVLLYGPPGTGkTLLAR	AAA+
PSMC6	UniRef100_P62333	26S protease regulatory subunit S10B [Ho	GCLLYGPPGTGkTLLAR	AAA+
RFC1	UniRef100_P35251	Activator 1 140 kDa subunit [Homo sapiens (Human)]	AALLSGPPGVGkTTTASLVCQELGYSYVELNASDTR	AAA+
RFC2	UniRef100_P35250	Activator 1 40 kDa subunit [Homo sapiens (Human)]	EGNVPNIIIAGPPGTGkTTSILCLAR	AAA+
RFC4	UniRef100_P35249	Activator 1 37 kDa subunit [Homo sapiens (Human)]	SLEGADLPNLLFYGPPGTGkTSTILAAAR	AAA+
RFC5	UniRef100_P40937	Activator 1 36 kDa subunit [Homo sapiens (Human)]	FINEDRLPHLLLYGPPGTGkTSTILACAK	AAA+
RUVBL1	UniRef100_Q9Y265	RuvB-like 1 [Homo sapiens (Human)]	AVLLAGPPGTGkTALALAIAQELGSK	AAA+
RUVBL2	UniRef100_Q9Y230	RuvB-like 2 n=1 Tax=Homo sapiens RepID=RUVB2_HUMAN	AVLIAGQPGTGkTAIAMGMAQALGPDTPFTAIAGSEIFSLEMSK	AAA+
SPG7	UniRef100_Q9UQ90	Paraplegin [Homo sapiens (Human)]	GALLLGPPGCGkTLLAK	AAA+
TOR1A	UniRef100_O14656	Torsin A precursor [Homo sapiens (Human)	KPLTLSLHGWTGTGkNFVSK	AAA+
TOR1B	UniRef100_O14657	Torsin B precursor [Homo sapiens (Human)]	KPLTLSLHGWAGTGkNFVSQIVAENLHPK	AAA+
TOR2A,TOR2X	UniRef100_Q5JU69	Torsin family 2, member A [Homo sapiens (Human)]	AFVRDPAPTKPLVLSLHGWTGTGkSYVSSLLAHYLFQGGLR	AAA+
TOR3A	UniRef100_Q5W0C6	Torsin family 3, member A [Homo sapiens	ALALSFHGWSGTGkNFVAR	AAA+
VCP	UniRef100_Q96IF9	VCP protein [Homo sapiens (Human)]	IVSQLLTLMDGLkQR	AAA+
VCP [ATP1]	UniRef100_Q96IF9	VCP protein [Homo sapiens (Human)]	GILLYGPPGTGkTLIAR	AAA+
VCP [ATP2]	UniRef100_Q96IF9	VCP protein [Homo sapiens (Human)]	GVLFYGPPGCGkTLLAK	AAA+
VCP [ATP2]	UniRef100_Q96IF9	VCP protein [Homo sapiens (Human)]	TLLAkAIANECQANFISIK	AAA+
VPS4A, VPS4B	UniRef100_Q9UN37	Vacuolar sorting protein 4a [Homo sapiens (Human)]	GILLFGPPGTGkSYLAK	AAA+
VPS4B	UniRef100_O75351	Vacuolar sorting protein 4b [Homo sapiens (Human)]	SYLAkAVATEANNSTFFSISSSDLVSK	AAA+
YME1L1	UniRef100_Q96TA2	ATP-dependent metalloprotease YME1L1 [Homo sapiens (Human)]	GILLVGPPGTGkTLLAR	AAA+
ABCB1 [ATP1]	UniRef100_P08183	Multidrug resistance protein 1 [Homo sapiens (Human)]	VQSGQTVALVGNSGCGkSTTVQLMQR	AAA+ (ABC)
ABCB1 [ATP2], ABCB4 [ATP2]	UniRef100_P08183	Multidrug resistance protein 1 [Homo sapiens (Human)]	KGQTLALVGSSGCGkSTVVQLLER	AAA+ (ABC)
ABCB10	UniRef100_Q9NRK6	ATP-binding cassette sub-family B member 10, mitochondrial precursor [Homo sapiens (Human)]	NVHFAYPARPEVPIFQDFSLSIPSGSVTALVGPSGSGkSTVLSLLLR	AAA+ (ABC)
ABCB11 [ATP1]	UniRef100_O95342	Bile salt export pump [Homo sapiens (Human)]	ILNDLNMVIKPGEMTALVGPSGAGkSTALQLIQR	AAA+ (ABC)
ABCB4 [ATP1]	UniRef100_P21439	Multidrug resistance protein 3 [Homo sapiens (Human)]	VQSGQTVALVGSSGCGkSTTVQLIQR	AAA+ (ABC)
ABCB6	UniRef100_Q9NP58	ATP-binding cassette sub-family B member 6, mitochondrial precursor [Homo sapiens (Human)]	ETLQDVSFTVMPGQTLALVGPSGAGkSTILR	AAA+ (ABC)
ABCB7	UniRef100_O75027	ATP-binding cassette sub-family B member 7, mitochondrial precursor [Homo sapiens (Human)]	VAIVGGSGSGkSTIVR	AAA+ (ABC)
ABCB8	UniRef100_Q9NUT2	ATP-binding cassette sub-family B member 8, mitochondrial precursor [Homo sapiens (Human)]	IVALVGQSGGGkTTVASLLER	AAA+ (ABC)
ABCB9	UniRef100_Q9NP78	ATP-binding cassette sub-family B member 9 precursor [Homo sapiens (Human)]	VTALVGPSGSGkSSCVNILENFYPLEGGR	AAA+ (ABC)
ABCC1 [ATP1]	UniRef100_P33527	Multidrug resistance-associated protein 1 (ATP-binding cassette sub- family C member 1) (Leukotriene C(4) transporter) [Homo sapiens (Human)]	SDPPTLNGITFSIPEGALVAVVGQVGCGkSSLLSALLAEMDKVEGHVAIK	AAA+ (ABC)
ABCC1 [ATP2]	UniRef100_P33527	Multidrug resistance-associated protein 1 (ATP-binding cassette sub- family C member 1) (Leukotriene C(4) transporter) [Homo sapiens (Human)]	TGAGkSSLTLGLFR	AAA+ (ABC)
ABCC10 [ATP1]	UniRef100_Q5T3U5	ATP-binding cassette, sub-family C (CFTR	VGCGkSSLLAAIAGELHR	AAA+ (ABC)
ABCC2 [ATP2]	UniRef100_Q92887	Canalicular multispecific organic anion transporter 1 [Homo sapiens (Human)]	TGAGkSSLTNCLFR	AAA+ (ABC)
ABCC3 [ATP1]	UniRef100_O15438	Canalicular multispecific organic anion transporter 2 [Homo sapiens (Human)]	GALVAVVGPVGCGkSSLVSALLGEMEK	AAA+ (ABC)
ABCC3 [ATP2]	UniRef100_O15438	Canalicular multispecific organic anion transporter 2 [Homo sapiens (Human)]	TGAGkSSMTLCLFR	AAA+ (ABC)
ABCC4 [ATP1]	UniRef100_O15439	Multidrug resistance-associated protein 4 [Homo sapiens (Human)]	ASETPTLQGLSFTVRPGELLAVVGPVGAGkSSLLSAVLGELAPSHGLVSVHGR	AAA+ (ABC)
ABCC4 [ATP2]	UniRef100_O15439	Multidrug resistance-associated protein 4 [Homo sapiens (Human)]	TGAGkSSLISALFR	AAA+ (ABC)
ABCD1, ABCD2	UniRef100_P33897	ATP-binding cassette sub-family D member 1 [Homo sapiens (Human)]	VEEGMHLLITGPNGCGkSSLFR	AAA+ (ABC)
ABCD3	UniRef100_P28288	ATP-binding cassette sub-family D member 3 [Homo sapiens (Human)]	SGANVLICGPNGCGkSSLFR	AAA+ (ABC)
ABCD4	UniRef100_O14678	ATP-binding cassette sub-family D member 4 [Homo sapiens (Human)]	ISEGQSLLITGNTGTGkTSLLR	AAA+ (ABC)
ABCE1 [ATP1]	UniRef100_P61221	ATP-binding cassette sub-family E member 1 [Homo sapiens (Human)]	LPIPRPGEVLGLVGTNGIGkSTALK	AAA+ (ABC)
ABCF1 [ATP2]	UniRef100_Q8NE71	ATP-binding cassette sub-family F member 1 [Homo sapiens (Human)]	ICIVGPNGVGkSTLLLLLTGK	AAA+ (ABC)
ABCF2 [ATP1]	UniRef100_Q75MJ1	Hypothetical protein ABCF2 [Homo sapiens (Human)]	YGLIGLNGIGkSMLLSAIGK	AAA+ (ABC)
ABCF2 [ATP2]	UniRef100_Q75MJ1	Hypothetical protein ABCF2 [Homo sapiens (Human)]	VALVGPNGAGkSTLLK	AAA+ (ABC)
ABCF3 [ATP2]	UniRef100_Q9NUQ8	ATP-binding cassette sub-family F member 3 n=1 Tax=Homo sapiens RepID=ABCF3_HUMAN	ICVVGENGAGkSTMLK	AAA+ (ABC)
AARS	UniRef100_Q53GV7	Alanyl-tRNA synthetase variant [Homo sap	AGGkHNDLDDVGKDVYHHTFFEMLGSWSFGDYFK	aaRS
EPRS	UniRef100_P07814	Bifunctional aminoacyl-tRNA synthetase [	WEFkHPQPFLR	aaRS
GARS	UniRef100_P41250	Glycyl-tRNA synthetase [Homo sapiens (Hu	TSGHVDkFADFMVK	aaRS
HARS	UniRef100_P12081	Histidyl-tRNA synthetase [Homo sapiens (	TICSSVDKLDkVSWEEVKNEMVGEK	aaRS
KARS	UniRef100_Q15046	Lysyl-tRNA synthetase [Homo sapiens (Hum	kEICNAYTELNDPMR	aaRS
NARS	UniRef100_O43776	Asparaginyl-tRNA synthetase, cytoplasmic	FPVEIkSFYMQR	aaRS
QARS	UniRef100_P47897	Glutaminyl-tRNA synthetase [Homo sapiens	TGDKWCIYPTYDYTHCLCDSIEHITHSLCTkEFQAR	aaRS
SARS	UniRef100_Q53HA4	Seryl-tRNA synthetase variant [Homo sapi	kLDLEAWFPGSGAFR	aaRS
ACTA2,ACTC1,ACTB,ACTG1,ACTG2,ACTBL2	UniRef100_P62736	Actin, aortic smooth muscle [Homo sapiens (Human)]	kYSVWIGGSILASLSTFQQMWISK	actin
ACTB,ACTG (POTEE,POTEF)	UniRef100_A1E282	Beta-actin (Fragment) n=3 Tax=Coelomata RepID=A1E282_HUMAN	DNGSGMCkAGFAGDDAPR	actin
ACTR2	UniRef100_P61160	Actin-like protein 2 [Homo sapiens (Human)]	kHMVFLGGAVLADIMK	actin
ACTR2	UniRef100_P61160	Actin-like protein 2 [Homo sapiens (Human)]	VVVCDNGTGFVkCGYAGSNFPEHIFPALVGRPIIR	actin
ACTR3	UniRef100_P61158	Actin-like protein 3 [Homo sapiens (Human)]	DREVGIPPEQSLETAkAVK	actin
ACTR3	UniRef100_P61158	Actin-like protein 3 [Homo sapiens (Human)]	LPACVVDCGTGYTkLGYAGNTEPQFIIPSCIAIK	actin
ACACA	UniRef100_Q13085	Acetyl-CoA carboxylase 1 (EC 6.4.1.2) (A	DVDDGLQAAEEVGYPVMIkASEGGGGK	ATP-Grasp
ACACA	UniRef100_Q13085	Acetyl-CoA carboxylase 1 (EC 6.4.1.2) (A	kVNNADDFPNLFR	ATP-Grasp
ACACB	UniRef100_O00763	Acetyl-CoA carboxylase 2 (EC 6.4.1.2) (A	IGFPLMIkASEGGGGK	ATP-Grasp
ACLY	UniRef100_P53396	ATP-citrate synthase (EC 2.3.3.8) (ATP-c	GkLGLVGVNLTLDGVK	ATP-Grasp
ACLY	UniRef100_P53396	ATP-citrate synthase (EC 2.3.3.8) (ATP-c	LLQDHPWLLSQNLVVKPDQLIkR	ATP-Grasp
CAD	UniRef100_P27708	CAD protein [Includes: Glutamine-depende	WDLSkFLR	ATP-Grasp
CPS1	UniRef100_P31327	Carbamoyl-phosphate synthase [ammonia],	IGSSMkSVGEVMAIGR	ATP-Grasp
GART (GARS)	UniRef100_P22102	Trifunctional purine biosynthetic protei	ASGLAAGkGVIVAK	ATP-Grasp
GART (GARS)	UniRef100_P22102	Trifunctional purine biosynthetic protei	SAGVQCFGPTAEAAQLESSkR	ATP-Grasp
GSS	UniRef100_P48637	Glutathione synthetase [Homo sapiens (Hu	CPDIATQLAGTkK	ATP-Grasp
GSS	UniRef100_P48637	Glutathione synthetase [Homo sapiens (Hu	TkAIEHADGGVAAGVAVLDNPYPV	ATP-Grasp
MCCC1	UniRef100_Q96RQ3	Methylcrotonoyl-CoA carboxylase alpha ch	HQkIIEEAPAPGIK	ATP-Grasp
MCCC1	UniRef100_Q96RQ3	Methylcrotonoyl-CoA carboxylase alpha ch	IGYPVMIkAVR	ATP-Grasp
PC	UniRef100_P11498	Pyruvate carboxylase, mitochondrial prec	AIAIAAGVPVVPGTDAPITSLHEAHEFSNTYGFPIIFkAAYGGGGR	ATP-Grasp
PC	UniRef100_P11498	Pyruvate carboxylase, mitochondrial prec	HQkVVEIAPAAHLDPQLR	ATP-Grasp
PCCA	UniRef100_P05165	Propionyl-CoA carboxylase alpha chain, m	EIGYPVMIkASAGGGGK	ATP-Grasp
PCCA	UniRef100_P05165	Propionyl-CoA carboxylase alpha chain, m	NQkVVEEAPSIFLDAETRR	ATP-Grasp
SUCLA2	UniRef100_Q9P2R7	Succinyl-CoA ligase [ADP-forming] beta-c	DVVIkAQVLAGGR	ATP-Grasp
SUCLA2	UniRef100_Q9P2R7	Succinyl-CoA ligase [ADP-forming] beta-c	GkGTFESGLK	ATP-Grasp
BAT1	UniRef100_Q13838	Spliceosome RNA helicase BAT1 [Homo sapiens (Human)]	SGMGkTAVFVLATLQQLEPVTGQVSVLVMCHTR	helicase
CHD4	UniRef100_Q14839	Chromodomain helicase-DNA-binding protei	FSWAQGTDTILADEMGLGkTVQTAVFLYSLYK	helicase
CHD8	UniRef100_Q9HCK8	Chromodomain-helicase-DNA-binding protein 8 [Homo sapiens (Human)]	LNTITPVVGKkRK	helicase
DDX18	UniRef100_Q9NVP1	ATP-dependent RNA helicase DDX18 [Homo sapiens (Human)]	TGSGkTLAFLIPAVELIVK	helicase
DDX21	UniRef100_Q9NR30	Nucleolar RNA helicase 2 [Homo sapiens (Human)]	TGTGkTFSFAIPLIEK	helicase
DDX39	UniRef100_O00148	ATP-dependent RNA helicase DDX39 [Homo sapiens (Human)]	SGMGkTAVFVLATLQQIEPVNGQVTVLVMCHTR	helicase
DDX39	UniRef100_O00148	ATP-dependent RNA helicase DDX39 [Homo sapiens (Human)]	YQQFkDFQR	helicase
DDX3X	UniRef100_B4DLU5	cDNA FLJ60675, highly similar to ATP-dep	DLMACAQTGSGkTAAFLLPILSQIYSDGPGEALR	helicase
DHX15	UniRef100_O43143	Putative pre-mRNA-splicing factor ATP-dependent RNA helicase DHX15 [Homo sapiens (Human)]	HQSFVLVGETGSGkTTQIPQWCVEYMR	helicase
DHX36	UniRef100_Q9H2U1	MLEL1 protein [Homo sapiens (Human)]	ELVNLIDNHQVTVISGETGCGkTTQVTQFILDNYIER	helicase
EIF4A1	UniRef100_P60842	Eukaryotic initiation factor 4A-I [Homo	GYDVIAQAQSGTGkTATFAISILQQIELDLK	helicase
EIFA3	UniRef100_P38919	Probable ATP-dependent RNA helicase DDX4	GRDVIAQSQSGTGkTATFSISVLQCLDIQVR	helicase
MOV10	UniRef100_Q9HCE1	Splice isoform 2 of Q9HCE1 [Homo sapiens	HIVTGTTRPAPYIIFGPPGTGkTVTLVEAIK	helicase
SKIV2L	UniRef100_Q15477	Helicase SKI2W [Homo sapiens (Human)]	HDSVFVAAHTSAGkTVVAEYAIALAQK	helicase
SNRNP200	UniRef100_O75643	U5 small nuclear ribonucleoprotein 200 kDa helicase [Homo sapiens (Human)]	LATYGITVAELTGDHQLCkEEISATQIIVCTPEKWDIITR	helicase
UPF1	UniRef100_Q92900	Regulator of nonsense transcripts 1 [Homo sapiens (Human)]	QGNGPVLVCAPSNIAVDQLTEkIHQTGLK	helicase
UPF1	UniRef100_Q92900	Regulator of nonsense transcripts 1 [Homo sapiens (Human)]	TVLQRPLSLIQGPPGTGkTVTSATIVYHLAR	helicase
XRCC3	UniRef100_O43542	DNA-repair protein XRCC3 [Homo sapiens (	SSAGkTQLALQLCLAVQFPR	helicase
XRCC5	UniRef100_P13010	ATP-dependent DNA helicase 2 subunit 2 n	FFMGNQVLkVFAAR	helicase
XRCC6	UniRef100_Q6FG89	G22P1 protein [Homo sapiens (Human)]	IQVTPPGFQLVFLPFADDkR	helicase
CCT2	UniRef100_P78371	T-complex protein 1 subunit beta [Homo s	GMDkILLSSGR	HSP60
CCT3	UniRef100_P49368	T-complex protein 1 subunit gamma [Homo	ISIPVDISDSDMMLNIINSSITTkAISR	HSP60
CCT4	UniRef100_P50991	T-complex protein 1 subunit delta n=1 Ta	DALSDLALHFLNkMK	HSP60
CCT5	UniRef100_P48643	T-complex protein 1 subunit epsilon [Hom	ISDSVLVDIKDTEPLIQTAkTTLGSK	HSP60
CCT6A	UniRef100_Q59ET3	Chaperonin containing TCP1, subunit 6A i	TkVHAELADVLTEAVVDSILAIKK	HSP60
CCT7	UniRef100_Q99832	T-complex protein 1 subunit eta [Homo sa	GkATISNDGATILK	HSP60
CCT8	UniRef100_Q4VBP8	Chaperonin containing TCP1, subunit 8 [H	TSIMSkQYGNEVFLAK	HSP60
HSPD1	UniRef100_P10809	60 kDa heat shock protein, mitochondrial	TVIIEQSWGSPkVTK	HSP60
TCP1 (CCT1)	UniRef100_P17987	T-complex protein 1 subunit alpha [Homo	VLCELADLQDkEVGDGTTSVVIIAAELLK	HSP60
HSPA13	UniRef100_P48723	Stress 70 protein chaperone microsome-as	IFTAEELEAEIGRYPFkVLNK	HSP70
HSPA14	UniRef100_Q9P0X2	Heat shock protein HSP60 [Homo sapiens (	SNILVFkLGGTSLSLSVMEVNSGIYR	HSP70
HSPA1A, HSPA1B (Hsp70)	UniRef100_P08107	Heat shock 70 kDa protein 1 [Homo sapien	LIGDAAkNQVALNPQNTVFDAK	HSP70
HSPA1A, HSPA1B (Hsp70)	UniRef100_P08107	Heat shock 70 kDa protein 1 [Homo sapien	LIGDAAkNQVALNPQNTVFDAKR	HSP70
HSPA2	UniRef100_P54652	Heat shock-related 70 kDa protein 2 [Hom	LIGDAAkNQVAMNPTNTIFDAK	HSP70
HSPA2	UniRef100_P54652	Heat shock-related 70 kDa protein 2 [Hom	LIGDAAkNQVAMNPTNTIFDAKR	HSP70
HSPA5 (Grp78)	UniRef100_P11021	78 kDa glucose-regulated protein precurs	LIGDAAkNQLTSNPENTVFDAK	HSP70
HSPA5 (Grp78)	UniRef100_P11021	78 kDa glucose-regulated protein precurs	LIGDAAkNQLTSNPENTVFDAKR	HSP70
HSPA8	UniRef100_P11142	Heat shock cognate 71 kDa protein [Homo	LIGDAAkNQVAMNPTNTVFDAK	HSP70
HSPA8	UniRef100_P11142	Heat shock cognate 71 kDa protein [Homo	LIGDAAkNQVAMNPTNTVFDAKR	HSP70
HSPA9 (Grp75)	UniRef100_P38646	Stress-70 protein, mitochondrial precurs	LVGMPAkR	HSP70
HYOU1	UniRef100_Q9Y4L1	150 kDa oxygen-regulated protein precurs	kTPVIVTLKENER	HSP70
HYOU1	UniRef100_Q9Y4L1	150 kDa oxygen-regulated protein precurs	RkTPVIVTLKENER	HSP70
HSP90AA (Hsp90a)	UniRef100_Q2PP14	Heat shock 90kDa protein 1, alpha [Homo	RAPFDLFENRkK	HSP90
HSP90AA (Hsp90a)	UniRef100_Q2PP14	Heat shock 90kDa protein 1, alpha [Homo	TLTIVDTGIGMTKADLINNLGTIAkSGTK	HSP90
HSP90AA, HSP90AB (Hsp90a, Hsp90b)	UniRef100_O14942	Heat shock protein beta [Homo sapiens (H	ADLINNLGTIAkSGTK	HSP90
HSP90AB (Hsp90b)	UniRef100_O14942	Heat shock protein beta [Homo sapiens (H	RAPFDLFENkKK	HSP90
HSP90AB (Hsp90b)	UniRef100_O14942	Heat shock protein beta [Homo sapiens (H	TLTLVDTGIGMTKADLINNLGTIAkSGTK	HSP90
TRA1 (Grp94)	UniRef100_P14625	Endoplasmin precursor [Homo sapiens (Hum	GLFDEYGSkK	HSP90
TRA1 (Grp94)	UniRef100_P14625	Endoplasmin precursor [Homo sapiens (Hum	NLGTIAkSGTSEFLNK	HSP90
TRAP1 (Trap-1)	UniRef100_Q12931	Heat shock protein 75 kDa, mitochondrial	SGSkAFLDALQNQAEASSK	HSP90
TRAP1 (Trap-1)	UniRef100_Q12931	Heat shock protein 75 kDa, mitochondrial	VLIQTkATDILPK	HSP90
AHCY	UniRef100_P23526	Adenosylhomocysteinase [Homo sapiens (Hu	SkFDNLYGCR	misc.
ALDH16A1	UniRef100_Q8IZ83	Aldehyde dehydrogenase 16 family, member	DSSGNLHGYVAEGGAkDIR	misc.
APRT	UniRef100_Q3KP55	Adenine phosphoribosyltransferase, isofo	GkLPGPTLWASYSLEYGK	misc.
ASNA1	UniRef100_O43681	Arsenical pump-driving ATPase [Homo sapi	HKIQAkYLDQMEDLYEDFHIVK	misc.
ASNA1	UniRef100_O43681	Arsenical pump-driving ATPase [Homo sapi	WIFVGGkGGVGK	misc.
ASNS	UniRef100_P08243	Asparagine synthetase [glutamine-hydroly	EAFSDGITSVkNSWFK	misc.
ASS1	UniRef100_P00966	Argininosuccinate synthase [Homo sapiens	QHGIPIPVTPkNPWSMDENLMHISYEAGILENPK	misc.
ATG7	UniRef100_O95352	Autophagy-related protein 7 [Homo sapien	FLLLTFADLkK	misc.
ATG7	UniRef100_O95352	Autophagy-related protein 7 [Homo sapien	QPLYEFEDCLGGGKPkALAAADR	misc.
ATIC	UniRef100_P31939	Bifunctional purine biosynthesis protein	KkNGNYCVLQMDQSYKPDENEVR	misc.
ATP5B	UniRef100_P06576	ATP synthase beta chain, mitochondrial precursor [Homo sapiens (Human)]	IGLFGGAGVGkTVLIMELINNVAK	misc.
BMS1	UniRef100_Q14692	Ribosome biogenesis protein BMS1 homolog	TPLEPPPIVVVVMGPPkVGK	misc.
CNP	UniRef100_P09543	2',3'-cyclic-nucleotide 3'-phosphodieste	AIFTGYYGkGKPVPTQGSR	misc.
CTPS	UniRef100_P17812	CTP synthase [Homo sapiens (Human)]	YILVTGGVISGIGkGIIASSVGTILK	misc.
DCTPP1	UniRef100_Q9H773	Hypothetical protein FLJ21190 [Homo sapi	kYTELPHGAISEDQAVGPADIPCDSTGQTST	misc.
DERA	UniRef100_Q53HN9	2-deoxyribose-5-phosphate aldolase homol	TVkKEWQAAWLLK	misc.
DUS1L	UniRef100_Q6P1R4	PP3111 protein [Homo sapiens (Human)]	TKEQkGPLSGAASWEHIK	misc.
FDPS	UniRef100_P14324	Farnesyl pyrophosphate synthetase (FPP s	IGTDIQDNkCSWLVVQCLQR	misc.
GMPS	UniRef100_P49915	GMP synthase [glutamine-hydrolyzing] [Ho	AELIkTHHNDTELIR	misc.
HDDC3	UniRef100_Q8N4P3	Hypothetical protein HDDC3 [Homo sapiens	LVEEVTDDKTLPkLER	misc.
HDDC3	UniRef100_Q8N4P3	Hypothetical protein HDDC3 [Homo sapiens	RkDPEGTPYINHPIGVAR	misc.
HNRNPU	UniRef100_Q00839	Heterogenous nuclear ribonucleoprotein U	KDCEVVMMIGLPGAGkTTWVTK	misc.
HPRT1	UniRef100_P00492	HPRT1 protein [Homo sapiens (Human)]	LkSYCNDQSTGDIK	misc.
IMPDH2	UniRef100_P12268	Inosine-5'-monophosphate dehydrogenase 2	GMGSLDAMDkHLSSQNR	misc.
LIG1	UniRef100_P18858	DNA ligase 1 [Homo sapiens (Human)]	RFEEAAFTCEYkYDGQR	misc.
LIG1	UniRef100_P18858	DNA ligase 1 [Homo sapiens (Human)]	VREDkQPEQATTSAQVACLYR	misc.
ME2	UniRef100_P23368	NAD-dependent malic enzyme, mitochondria	AkIDSYQEPFTHSAPESIPDTFEDAVNILKPSTIIGVAGAGR	misc.
ME2	UniRef100_P23368	NAD-dependent malic enzyme, mitochondria	SIVDNWPENHVkAVVVTDGER	misc.
MTHFD1	UniRef100_P11586	C-1-tetrahydrofolate synthase, cytoplasm	YVVVTGITPTPLGEGkSTTTIGLVQALGAHLYQNVFACVR	misc.
MTHFD1L	UniRef100_Q5JYA8	Methylenetetrahydrofolate dehydrogenase	YVLVAGITPTPLGEGkSTVTIGLVQALTAHLNVNSFACLR	misc.
NADSYN1	UniRef100_Q6IA69	NADSYN1 protein [Homo sapiens (Human)]	YDCSSADINPIGGISkTDLR	misc.
NMNAT3	UniRef100_Q96T66	Nicotinamide mononucleotide adenylyltran	DHLHQTGMYQVIQGIISPVNDTYGkK	misc.
NOP2	UniRef100_P46087	Proliferating-cell nucleolar antigen p12	VLLDAPCSGTGVISkDPAVK	misc.
NT5E	UniRef100_Q53Z63	5'-nucleotidase [Homo sapiens (Human)]	GVDVVVGGHSNTFLYTGNPPSkEVPAGKYPFIVTSDDGR	misc.
NTPCR	UniRef100_Q9BSD7	Probable UPF0334 kinase-like protein C1orf57 [Homo sapiens (Human)]	HVFLTGPPGVGkTTLIHK	misc.
NUBP1	UniRef100_P53384	Nucleotide-binding protein 1 [Homo sapiens (Human)]	ILVLSGkGGVGK	misc.
NUBPL	UniRef100_Q8TB37	Nucleotide-binding protein-like n=2 Tax=	QVIVVASGkGGVGK	misc.
OLA1	UniRef100_Q9NTK5	Putative GTP-binding protein PTD004 [Hom	IGIVGLPNVGkSTFFNVLTNSQASAENFPFCTIDPNESR	misc.
PAICS	UniRef100_Q68CQ5	Hypothetical protein DKFZp781N1372 [Homo	TkEVYELLDSPGK	misc.
PAICS	UniRef100_Q68CQ5	Hypothetical protein DKFZp781N1372 [Homo	VELFFkDDANNDPQWSEEQLIAAK	misc.
PAPOLA	UniRef100_P51003	Poly(A) polymerase alpha [Homo sapiens (	AIkLWAK	misc.
PAPOLG	UniRef100_Q9BWT3	Poly(A) polymerase gamma [Homo sapiens (	AVkLWAK	misc.
PDE12	UniRef100_Q6L8Q7	2',5'-phosphodiesterase 12 n=1 Tax=Homo	IkQHEGLATFYR	misc.
PET112 (GatB)	UniRef100_O75879	Probable glutamyl-tRNA(Gln) amidotransfe	IkQIQLEQDSGK	misc.
PET112 (GatB)	UniRef100_O75879	Probable glutamyl-tRNA(Gln) amidotransfe	kHYFYADLPAGYQITQQR	misc.
PFAS	UniRef100_O15067	Phosphoribosylformylglycinamidine syntha	HWFFkGQLHVDGQK	misc.
PMS2	UniRef100_P54278	PMS1 protein homolog 2 [Homo sapiens (Hu	HHTSkIQEFADLTQVETFGFRGEALSSLCALSDVTISTCHASAK	misc.
PMS2	UniRef100_P54278	PMS1 protein homolog 2 [Homo sapiens (Hu	kSVHQICSGQVVLSLSTAVK	misc.
POLR3A	UniRef100_O14802	DNA-directed RNA polymerase III largest	MAQELkYGDIVER	misc.
PPAT	UniRef100_Q06203	Amidophosphoribosyltransferase precursor	CGLPYVEVLCkNR	misc.
PPAT	UniRef100_Q06203	Amidophosphoribosyltransferase precursor	kFGVLSDNFK	misc.
PPCS	UniRef100_Q9HAB8	Phosphopantothenate--cysteine ligase [Ho	AFIISFkLETDPAIVINR	misc.
PPCS	UniRef100_Q9HAB8	Phosphopantothenate--cysteine ligase [Ho	MVPkLLSPLVK	misc.
PRKAG1	UniRef100_P54619	5'-AMP-activated protein kinase, gamma-1	GRVVDIYSkFDVINLAAEK	misc.
PRKAG1	UniRef100_P54619	5'-AMP-activated protein kinase, gamma-1	LPVIDPESGNTLYILTHkR	misc.
PRKAG1, PRKAG2	UniRef100_P54619	5'-AMP-activated protein kinase, gamma-1	VVDIYSkFDVINLAAEK	misc.
PRKAG2	UniRef100_Q9UGJ0	5'-AMP-activated protein kinase, gamma-2	ISALPVVDESGKVVDIYSkFDVINLAAEK	misc.
PRKAG2	UniRef100_Q9UGJ0	5'-AMP-activated protein kinase, gamma-2	LPVIDPISGNALYILTHkR	misc.
PSMD9	UniRef100_O00233	26S proteasome non-ATPase regulatory sub	HNIICLQNDHkAVMK	misc.
RAD17	UniRef100_O75943	Cell cycle checkpoint protein RAD17 [Hom	QGGSILLITGPPGCGkTTTLK	misc.
SMC1A	UniRef100_Q14683	Structural maintenance of chromosome 1-l	FTAIIGPNGSGkSNLMDAISFVLGEK	misc.
SMC3	UniRef100_Q9UQE7	Structural maintenance of chromosomes pr	NGSGkSNFFYAIQFVLSDEFSHLRPEQR	misc.
SMC4	UniRef100_Q9NTJ3	Structural maintenance of chromosomes 4-	LMITHIVNQNFkSYAGEK	misc.
TRMU	UniRef100_O75648	tRNA (5-methylaminomethyl-2-thiouridylat	LLQAADSFkDQTFFLSQVSQDALRR	misc.
TRMU	UniRef100_O75648	tRNA (5-methylaminomethyl-2-thiouridylat	TPNPDIVCNkHIK	misc.
TTL	UniRef100_Q8NG68	Tubulin--tyrosine ligase [Homo sapiens (	KKEDGEGNVWIAkSSAGAK	misc.
TTL	UniRef100_Q8NG68	Tubulin--tyrosine ligase [Homo sapiens (	SSAGAkGEGILISSEASELLDFIDNQGQVHVIQK	misc.
TTLL12	UniRef100_Q14166	Tubulin--tyrosine ligase-like protein 12	LSQERPGVLLNQFPCENLLTVkDCLASIAR	misc.
TTLL12	UniRef100_Q14166	Tubulin--tyrosine ligase-like protein 12	WGEDNHWICkPWNLAR	misc.
VWA8	UniRef100_A3KMH1	Uncharacterized protein KIAA0564 n=2 Tax=Homo sapiens RepID=K0564_HUMAN	LGHILVVDEADKAPTNVTCILkTLVENGEMILADGRR	misc.
MYH10	UniRef100_P35580	Myosin-10 [Homo sapiens (Human)]	FSkVEDMAELTCLNEASVLHNLK	myosin
MYH10,MYH9,MYH11,MYH14	UniRef100_P35580	Myosin-10 [Homo sapiens (Human)]	EDQSILCTGESGAGkTENTK	myosin
MYH11,MYH14	UniRef100_P35749	Myosin-11 [Homo sapiens (Human)]	SMLQDREDQSILCTGESGAGkTENTK	myosin
MYH9	UniRef100_Q5BKV1	Hypothetical protein [Homo sapiens (Huma	SMMQDREDQSILCTGESGAGkTENTKK	myosin
MYO1A	UniRef100_Q9UBC5	Myosin Ia [Homo sapiens (Human)]	DRDRDQCILITGESGSGkTEASK	myosin
MYO1B	UniRef100_O43795	Myosin Ib [Homo sapiens (Human)]	SLRDQDKDQCILITGESGAGkTEASK	myosin
MYO1E	UniRef100_Q12965	Myosin Ie [Homo sapiens (Human)]	NMIIDRENQCVIISGESGAGkTVAAK	myosin
IDI1, IDI2	UniRef100_Q13907	Isopentenyl-diphosphate delta-isomerase	QQVQLLAEMCILIDENDNKIGAETkK	nudix
NUDT1	UniRef100_P36639	7,8-dihydro-8-oxoguanine triphosphatase	LYTLVLVLQPQRVLLGMkK	nudix
NUDT1	UniRef100_P36639	7,8-dihydro-8-oxoguanine triphosphatase	WNGFGGkVQEGETIEDGAR	nudix
NUDT10	UniRef100_Q8NFP7	Diphosphoinositol polyphosphate phosphoh	VLQCHkPVHAEYLEK	nudix
NUDT2	UniRef100_P50583	Bis(5'-nucleosyl)-tetraphosphatase [asym	NKPkTVIYWLAEVKDYDVEIR	nudix
NUDT2	UniRef100_P50583	Bis(5'-nucleosyl)-tetraphosphatase [asym	VDNNAIEFLLLQASDGIHHWTPPkGHVEPGEDDLETALR	nudix
NUDT3	UniRef100_O95989	Diphosphoinositol polyphosphate phosphoh	VLQYHkPVQASYFETLR	nudix
AK1	UniRef100_P00568	Adenylate kinase isoenzyme 1 [Homo sapie	IIFVVGGPGSGkGTQCEK	small molecule kinase
AK1	UniRef100_P00568	Adenylate kinase isoenzyme 1 [Homo sapie	TKIIFVVGGPGSGkGTQCEK	small molecule kinase
AK2	UniRef100_P54819	Adenylate kinase 2, mitochondrial n=2 Ta	AVLLGPPGAGkGTQAPR	small molecule kinase
AK3	UniRef100_Q7Z4Y4	GTP:AMP phosphotransferase [Homo sapiens	AVIMGAPGSGkGTVSSR	small molecule kinase
AK4	UniRef100_P27144	Adenylate kinase isoenzyme 4, mitochondr	AVILGPPGSGkGTVCQR	small molecule kinase
AK5	UniRef100_Q9Y6K8	Adenylate kinase isoenzyme 5 [Homo sapie	IIFIIGGPGSGkGTQCEK	small molecule kinase
AK7	UniRef100_Q96M32	Adenylate kinase 7 n=1 Tax=Homo sapiens	ICILGPPAVGkSSIAK	small molecule kinase
AK8	UniRef100_Q96MA6	Hypothetical protein FLJ32704 [Homo sapi	VLLLGPVGSGkSLQAALLAQK	small molecule kinase
ALDH18A1	UniRef100_P54886	Delta 1-pyrroline-5-carboxylate syntheta	LIDIFYPGDQQSVTFGTkSR	small molecule kinase
CMPK1	UniRef100_P30085	UMP-CMP kinase [Homo sapiens (Human)]	MKPLVVFVLGGPGAGkGTQCAR	small molecule kinase
CMPK2	UniRef100_Q5EBM0	LOC129607 protein [Homo sapiens (Human)]	FQVVAIEGLDATGkTTVTQSVADSLK	small molecule kinase
COASY	UniRef100_Q13057	Bifunctional coenzyme A synthase (CoA sy	MLGNLLRPPYERPELPTCLYVIGLTGISGSGkSSIAQR	small molecule kinase
COASY	UniRef100_Q13057	Bifunctional coenzyme A synthase (CoA sy	SkLLPELLQPYTER	small molecule kinase
DCK	UniRef100_Q5TZY7	Deoxycytidine kinase [Homo sapiens (Huma	ISIEGNIAAGkSTFVNILK	small molecule kinase
DGUOK	UniRef100_Q16854	Deoxyguanosine kinase, mitochondrial pre	RLSIEGNIAVGkSTFVK	small molecule kinase
DTYMK	UniRef100_P23919	Thymidylate kinase [Homo sapiens (Human)	GALIVLEGVDRAGkSTQSR	small molecule kinase
MVK	UniRef100_Q03426	Mevalonate kinase [Homo sapiens (Human)]	GLHSkLTGAGGGGCGITLLKPGLEQPEVEATK	small molecule kinase
NME1, NME2	UniRef100_P15531	Nucleoside diphosphate kinase A [Homo sa	TFIAIkPDGVQR	small molecule kinase
NME3	UniRef100_Q13232	Nucleoside diphosphate kinase 3 [Homo sa	GDFCIEVGkNLIHGSDSVESAR	small molecule kinase
NRK1	UniRef100_Q9NWW6	Nicotinamide riboside kinase 1 [Homo sap	TFIIGISGVTNSGkTTLAK	small molecule kinase
PFKFB2	UniRef100_O60825	6-phosphofructo-2-kinase/fructose-2,6-bi	VFFVESVCDDPDVIAANILEVkVSSPDYPER	small molecule kinase
PGK1	UniRef100_P00558	Phosphoglycerate kinase 1 n=3 Tax=Homini	ALESPERPFLAILGGAkVADK	small molecule kinase
PKM2	UniRef100_Q504U3	PKM2 protein [Homo sapiens (Human)]	AEGSDVANAVLDGADCIMLSGETAkGDYPLEAVR	small molecule kinase
PMVK	UniRef100_Q15126	Phosphomevalonate kinase [Homo sapiens (	SGkDFVTEALQSR	small molecule kinase
PRPS1	UniRef100_Q53FW2	Phosphoribosyl pyrophosphate synthetase	NCTIVSPDAGGAkR	small molecule kinase
PRPS2, PRPS1L1	UniRef100_P11908	Ribose-phosphate pyrophosphokinase 2 n=3	NCIIVSPDAGGAkR	small molecule kinase
RBKS	UniRef100_Q9H477	Ribokinase [Homo sapiens (Human)]	FFIGFGGkGANQCVQAAR	small molecule kinase
RFK	UniRef100_Q969G6	Riboflavin kinase [Homo sapiens (Human)]	GSkQLGIPTANFPEQVVDNLPADISTGIYYGWASVGSGDVHK	small molecule kinase
TK2	UniRef100_O00142	Thymidine kinase 2, mitochondrial precur	TTCLEFFSNATDVEVLTEPVSkWR	small molecule kinase
UBA1	UniRef100_P22314	Ubiquitin-activating enzyme E1 [Homo sap	GNVQVVIPFLTESYSSSQDPPEkSIPICTLK	Ub-act E1
UBA2	UniRef100_Q9UBT2	Ubiquitin-like 1-activating enzyme E1B [	GDGAELIWDkDDPSAMDFVTSAANLR	Ub-act E1
UBA2	UniRef100_Q9UBT2	Ubiquitin-like 1-activating enzyme E1B [	VHLAEKGDGAELIWDkDDPSAMDFVTSAANLR	Ub-act E1
UBA3	UniRef100_Q8TBC4	NEDD8-activating enzyme E1 catalytic sub	DIGRPkAEVAAEFLNDR	Ub-act E1
UBA3	UniRef100_Q8TBC4	NEDD8-activating enzyme E1 catalytic sub	DIGRPkAEVAAEFLNDRVPNCNVVPHFNK	Ub-act E1
UBA5	UniRef100_Q9GZZ9	Ubiquitin-activating enzyme E1 domain-co	LFFQPHQAGLSkVQAAEHTLR	Ub-act E1
UBA6	UniRef100_A0AVT1	Ubiquitin-like modifier-activating enzym	GMITVTDPDLIEkSNLNR	Ub-act E1
UBA7	UniRef100_P41226	Ubiquitin-activating enzyme E1 homolog [	SQDVGRPkAEVAAAAAR	Ub-act E1
